# Supplementary material for: Autologous Neural Stem Cell Encapsulation in CT04-Integrated Fibrin Hydrogel Enhances Tissue Regeneration After Spinal Cord Injury in Monkeys
Source: Research Square preprint supplement (doi:10.21203/rs.3.rs-7871658/v1), 2025-11-17
Supplement: Supplementary file 1 [file 9a7b1568e673639de107a683.docx]

Supplementary information:

| 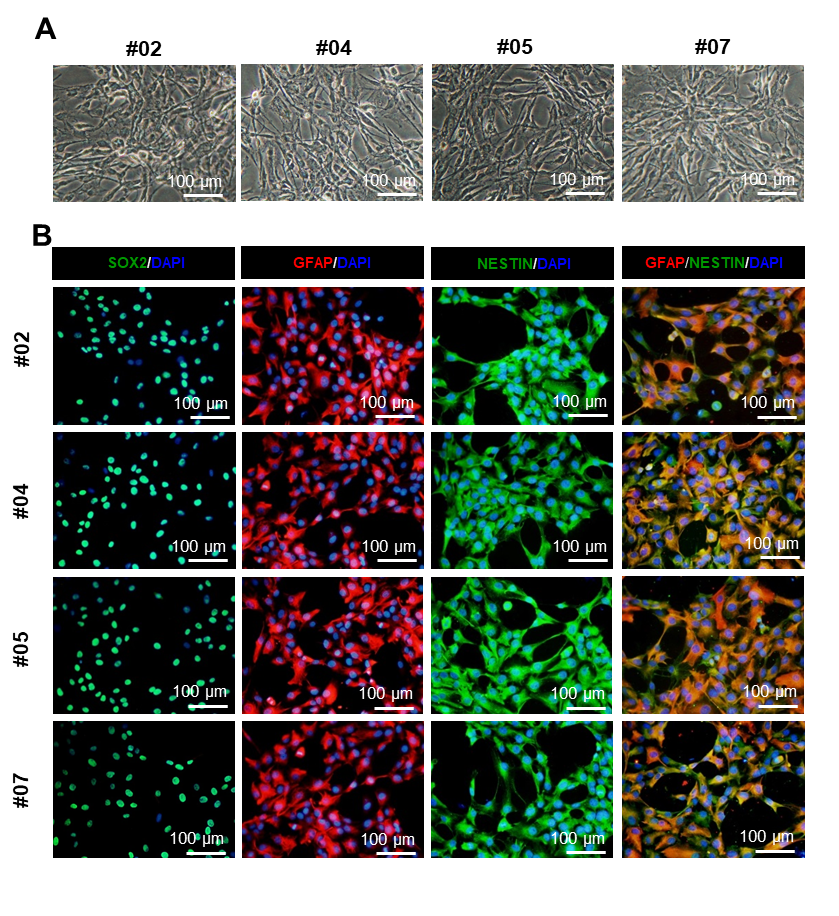 |
| --- |
| **S.1. Cell characterization for 4 animals.** A) Phase-contrast imaging of the SVZ-NSC in each subject in transplanted groups at passage four. B) Expression of NSC Markers (SOX2, NESTIN, and GFAP and co-expression of GFAP/NESTIN) for all animals in transplantation groups. |

| 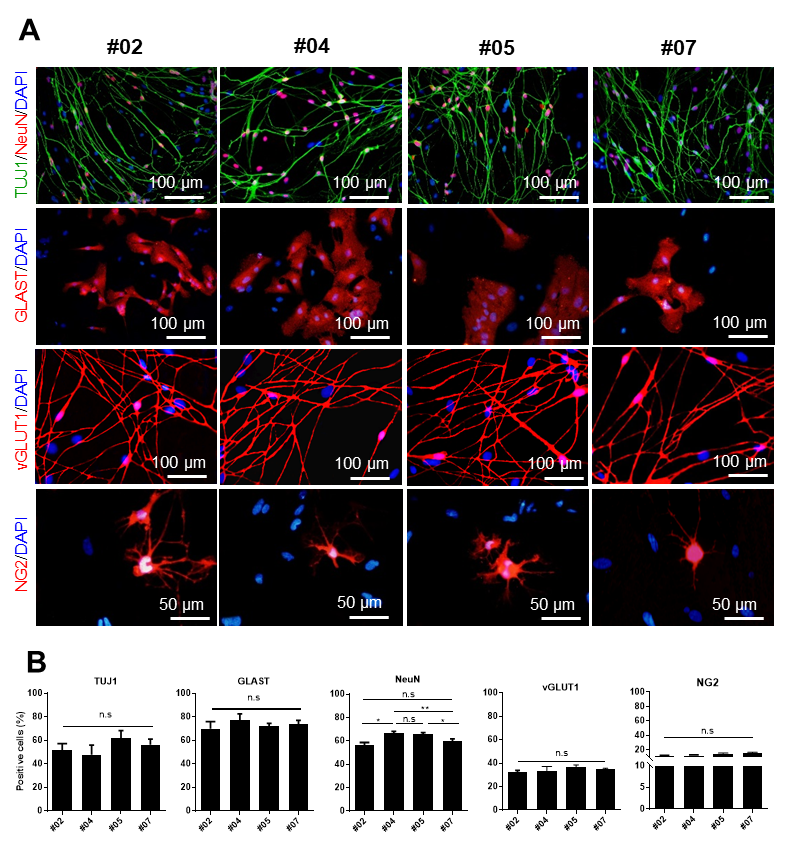 |
| --- |
| **S. 2. SVZ-NSCs multipotency in Vitro evaluation.**A) Spontaneous differentiation of SVZ-NSCs has been assessed by immunolabeling for TUJ1, NeuN (co-expression), GLAST (as a glial marker), vGLUT1 (glutamatergic neuron’s marker) and NG2 (oligodendrocyte’s marker) for each animal. B) Quantification of all markers in part A did not show any difference in all animals except in NeuN (p < 0.05, one-way ANOVA, Tukey posttest). |

| 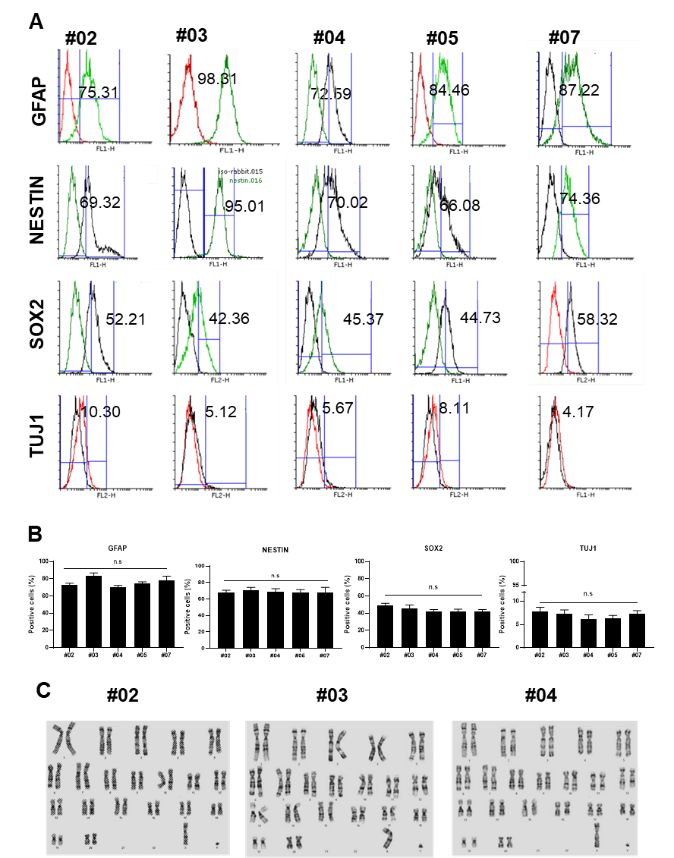 |
| --- |
| **S. 3.  Flow cytometry and Karyotype assessment.** A, B) Flow cytometry has demonstrated NSC properties for all 4 subjects. The individual histogram has been represented for NESTIN, GFAP, SOX2, and TUJ1. C) Karyotype analysis did not show any chromosomal abnormality in number and structure after four passages In Vitro. |

| 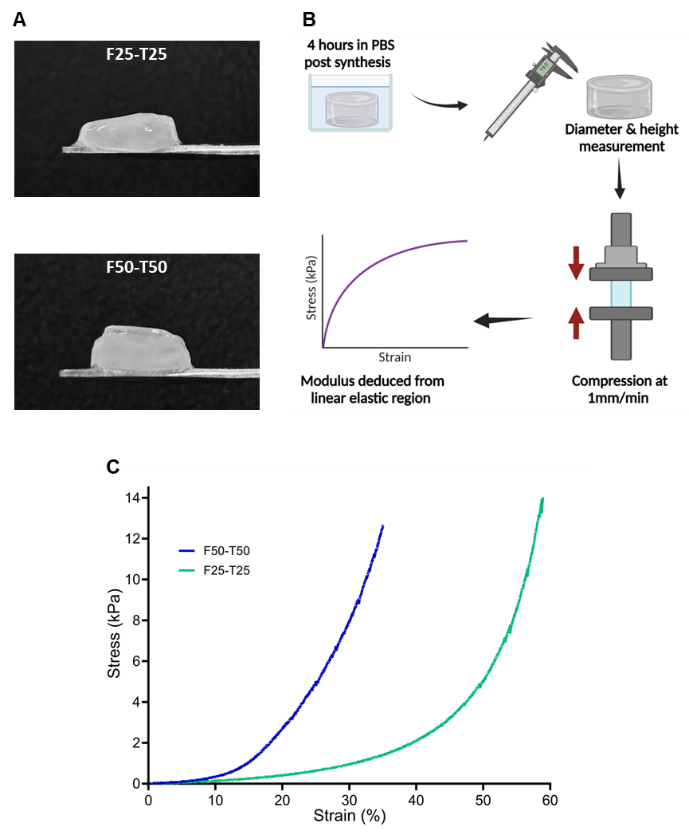 |
| --- |
| **S. 4. Macrographs of fibrin hydrogels and compression testing workflow. A)** Side-view of F25-T25 and F50-T50 fibrin hydrogels equilibrated in PBS for 4 hours post-synthesis. **(B)** Schematic illustration of the compression testing process. Hydrogels were equilibrated, measured for diameter and height, and subjected to uniaxial compression at a rate of 1 mm/min. The elastic modulus was extracted from the linear elastic region of the stress-strain curve. **(C)** Stress-strain profiles of F50-T50 and F25-T25 fibrin hydrogels, capturing their mechanical behavior under increasing compressive strain. |
